# Supplementary material for: The quantification of human chorionic gonadotropin by two isotope dilution mass spectrometry methods
Source: Royal Society of Chemistry journal article supplement (doi:10.1039/c4ay01488j), 2014-08-22
Supplement: c4ay01488j1.pdf [file c4ay01488j1.pdf]

## 1. Solution preparation

Mixed amino-acid standard work solutions for hCG hydrolysis quantification: A mixed label-free amino-acid standard solution (MLFS) contained 102  $\mu\text{L}$  phenylalanine stock solutions, 278  $\mu\text{L}$  proline stock solutions, 191  $\mu\text{L}$  valine stock solution and 9429  $\mu\text{L}$  water. A mixed isotope labeled solution (MILS) contained 102  $\mu\text{L}$   $^{13}\text{C}_9$ -L-phenylalanine stock solution, 278  $\mu\text{L}$   $^{13}\text{C}_5$  L-proline stock solution, 278  $\mu\text{L}$   $^{13}\text{C}_5$ -L-valine stock solution and 9342  $\mu\text{L}$  water. A lower level standard solution contained 123  $\mu\text{L}$  MLFS and 98  $\mu\text{L}$  MILS. A higher level standard solution contained 193  $\mu\text{L}$  MLFS and 100  $\mu\text{L}$  MILS.

Mixed amino-acids standard work solutions for signature peptide quantification: A MLFS contained 178  $\mu\text{L}$  leucine stock solution, 100  $\mu\text{L}$  proline stock solution, 207  $\mu\text{L}$  valine stock solution and 9515  $\mu\text{L}$  water. MILS contained 178  $\mu\text{L}$   $\text{d}_{10}$ -Leucine stock solution, 103  $\mu\text{L}$   $^{13}\text{C}_5$ -proline stock solution,  $^{13}\text{C}_5$ -valine stock solution and 9264  $\mu\text{L}$  water. A lower level standard solutions contained 124  $\mu\text{L}$  MLFS and 200  $\mu\text{L}$  MILS. A higher level standard solution contained 193  $\mu\text{L}$  MLFS and 200  $\mu\text{L}$  MILS. Peptide work solutions were prepared as followed with accurate weighing: A label free solution (LFS) contained 750  $\mu\text{L}$  VR stock solution and 9250  $\mu\text{L}$  water. An isotope labeled solution (ILS) contained 750  $\mu\text{L}$   $\text{d}_{10}$ -VR stock solution and 9250  $\mu\text{L}$  water. A lower level standard solution contained 125  $\mu\text{L}$  LFS and 200  $\mu\text{L}$  ILS. A higher level standard solution contained 231  $\mu\text{L}$  LFS and 200  $\mu\text{L}$  ILS.

## 2. Supplementary Tables

**Table 8** Uncertainty budget of signature peptide value assignment

|                                                                | Sensitivity factor     | Direct uncertainty    | Uncertainty component   |
|----------------------------------------------------------------|------------------------|-----------------------|-------------------------|
| Weighing of leucine                                            | $2.47 \times 10^{-5}$  | $5.77 \times 10^{-7}$ | $1.43 \times 10^{-11}$  |
| Weighing of water for leucine stock solution preparation       | $-2.45 \times 10^{-8}$ | $5.77 \times 10^{-6}$ | $-1.41 \times 10^{-13}$ |
| Weighing of leucine stock solution                             | $1.31 \times 10^{-6}$  | $5.77 \times 10^{-6}$ | $7.56 \times 10^{-12}$  |
| The sample area ratio of leucine to leucine- $\text{d}_{10}$   | $4.25 \times 10^{-4}$  | $5.77 \times 10^{-3}$ | $2.45 \times 10^{-6}$   |
| The standard area ratio of leucine to leucine- $\text{d}_{10}$ | $-3.98 \times 10^{-4}$ | $5.77 \times 10^{-3}$ | $-2.30 \times 10^{-6}$  |
| Leucine purity                                                 | $2.49 \times 10^{-4}$  | $4.62 \times 10^{-3}$ | $1.15 \times 10^{-6}$   |
| The molecular weight of leucine                                | $-1.89 \times 10^{-6}$ | $5.77 \times 10^{-3}$ | $-1.09 \times 10^{-8}$  |
| The number of leucine in peptide                               | $-8.27 \times 10^{-5}$ | 0.00                  | 0                       |
| Weighing of proline                                            | $3.04 \times 10^{-5}$  | $5.77 \times 10^{-7}$ | $1.75 \times 10^{-11}$  |
| Weighing of water for proline stock solution preparation       | $-3.14 \times 10^{-8}$ | $5.77 \times 10^{-6}$ | $-1.81 \times 10^{-13}$ |
| Weighing of proline stock solution                             | $3.03 \times 10^{-6}$  | $5.77 \times 10^{-6}$ | $1.75 \times 10^{-11}$  |
| The sample area ratio of proline to proline- $^{13}\text{C}_5$ | $4.32 \times 10^{-4}$  | $5.77 \times 10^{-3}$ | $2.49 \times 10^{-6}$   |

|                                                                             |                        |                       |                         |
|-----------------------------------------------------------------------------|------------------------|-----------------------|-------------------------|
| The standard area ratio of proline to proline- <sup>13</sup> C <sub>5</sub> | -5.07×10 <sup>-4</sup> | 5.77×10 <sup>-3</sup> | -2.92×10 <sup>-6</sup>  |
| proline purity                                                              | 3.13×10 <sup>-4</sup>  | 4.62×10 <sup>-3</sup> | 1.45×10 <sup>-6</sup>   |
| The molecular weight of proline                                             | -2.71×10 <sup>-6</sup> | 5.77×10 <sup>-3</sup> | -1.25×10 <sup>-8</sup>  |
| The number of proline in peptide                                            | -1.56×10 <sup>-4</sup> | 0.00                  | 0                       |
| Weighing of valine                                                          | 2.41×10 <sup>-5</sup>  | 5.77×10 <sup>-7</sup> | 1.39×10 <sup>-11</sup>  |
| Weighing of water for valine stock solution preparation                     | -2.40×10 <sup>-8</sup> | 5.77×10 <sup>-6</sup> | -1.38×10 <sup>-13</sup> |
| Weighing of valine stock solution                                           | 1.09×10 <sup>-6</sup>  | 5.77×10 <sup>-6</sup> | 6.29×10 <sup>-12</sup>  |
| The sample area ratio of valine to valine- <sup>13</sup> C <sub>5</sub>     | 4.59×10 <sup>-4</sup>  | 5.77×10 <sup>-3</sup> | 2.65×10 <sup>-10</sup>  |
| The standard area ratio of valine to valine- <sup>13</sup> C <sub>5</sub>   | -4.28×10 <sup>-4</sup> | 5.77×10 <sup>-3</sup> | -2.47×10 <sup>-6</sup>  |
| Valine purity                                                               | 2.45×10 <sup>-4</sup>  | 4.62×10 <sup>-3</sup> | 1.13×10 <sup>-6</sup>   |
| The molecular weight of valine                                              | -2.08×10 <sup>-6</sup> | 5.77×10 <sup>-3</sup> | -1.20×10 <sup>-8</sup>  |
| The number of valine in peptide                                             | -6.08×10 <sup>-6</sup> | 0.00                  | 0                       |
| Weighing of water for standard mixed amino acids                            | -8.02×10 <sup>-8</sup> | 5.77×10 <sup>-6</sup> | -4.63×10 <sup>-13</sup> |
| Weighing of mixed standard amino acids                                      | 6.47×10 <sup>-6</sup>  | 5.77×10 <sup>-6</sup> | 3.73×10 <sup>-11</sup>  |
| Weighing of water for standard mixed label amino acids                      | -3.99×10 <sup>-5</sup> | 5.77×10 <sup>-6</sup> | -2.30×10 <sup>-10</sup> |
| Weighing of the peptide sample solution                                     | -8.04×10 <sup>-5</sup> | 5.77×10 <sup>-6</sup> | -4.64×10 <sup>-10</sup> |
| Weighing of standard mixed label amino acids to peptide sample              | 5.20×10 <sup>-6</sup>  | 5.77×10 <sup>-6</sup> | 3.00×10 <sup>-11</sup>  |
| The molecular weight of peptide                                             | 4.29×10 <sup>-7</sup>  | 5.77×10 <sup>-5</sup> | 2.48×10 <sup>-11</sup>  |
| Weighing of peptide (solid)                                                 | -5.01×10 <sup>-1</sup> | 5.77×10 <sup>-7</sup> | -2.89×10 <sup>-7</sup>  |
| Weighing of water for peptide (solid)                                       | 5.11×10 <sup>-4</sup>  | 5.77×10 <sup>-6</sup> | 2.95×10 <sup>-9</sup>   |

**Table 9** Uncertainty budget of hCG value assignment (hCG enzymatic digestion)

|                                                                      | Sensitivity factor     | Direct uncertainty    | Uncertainty component   |
|----------------------------------------------------------------------|------------------------|-----------------------|-------------------------|
| Weighing of peptide                                                  | 4.74×10 <sup>-4</sup>  | 5.77×10 <sup>-7</sup> | 2.73×10 <sup>-10</sup>  |
| Weighing of water for peptide stock solution preparation             | -4.79×10 <sup>-8</sup> | 5.77×10 <sup>-6</sup> | -2.76×10 <sup>-13</sup> |
| Weighing of peptide stock solution                                   | 4.46×10 <sup>-7</sup>  | 5.77×10 <sup>-6</sup> | 2.57×10 <sup>-12</sup>  |
| The sample area ratio of peptide to peptide-(d <sub>10</sub> -Leu)   | 10.00×10 <sup>-5</sup> | 5.77×10 <sup>-3</sup> | 5.77×10 <sup>-7</sup>   |
| The standard area ratio of peptide to peptide-(d <sub>10</sub> -Leu) | -1.48×10 <sup>-4</sup> | 5.77×10 <sup>-3</sup> | -8.54×10 <sup>-7</sup>  |
| Peptide purity                                                       | 4.38×10 <sup>-4</sup>  | 4.62×10 <sup>-3</sup> | 2.02×10 <sup>-6</sup>   |
| The molecular weight of peptide                                      | -1.87×10 <sup>-7</sup> | 5.77×10 <sup>-3</sup> | -1.08×10 <sup>-9</sup>  |
| The number of peptide in hCG                                         | -3.60×10 <sup>-4</sup> | 0.00                  | 0                       |
| Weighing of water for standard mixed label peptides                  | -3.46×10 <sup>-8</sup> | 5.77×10 <sup>-6</sup> | -2.00×10 <sup>-13</sup> |
| Weighing of mixed signature peptides                                 | 2.87×10 <sup>-6</sup>  | 5.77×10 <sup>-6</sup> | 1.66×10 <sup>-11</sup>  |

|                                                         |                        |                       |                         |
|---------------------------------------------------------|------------------------|-----------------------|-------------------------|
| Weighing of the hCG sample solution                     | $-1.81 \times 10^{-6}$ | $5.77 \times 10^{-6}$ | $-1.04 \times 10^{-11}$ |
| Weighing of standard mixed peptides to hCG sample       | $-9.28 \times 10^{-6}$ | $5.77 \times 10^{-6}$ | $-5.35 \times 10^{-11}$ |
| Weighing of standard mixed label peptides to hCG sample | $1.91 \times 10^{-6}$  | $5.77 \times 10^{-6}$ | $1.10 \times 10^{-11}$  |
| The molecular weight of hCG                             | $1.40 \times 10^{-8}$  | $5.77 \times 10^{-5}$ | $8.08 \times 10^{-13}$  |
| Weighing of hCG (solid)                                 | $-5.01 \times 10^{-1}$ | $5.77 \times 10^{-7}$ | $-2.89 \times 10^{-7}$  |
| Weighing of water for hCG (solid)                       | $5.11 \times 10^{-4}$  | $5.77 \times 10^{-6}$ | $2.95 \times 10^{-9}$   |

---
